# CORRECTION

## Correction: Identification of a characteristic vascular belt zone in human colorectal cancer

The *PLOS ONE* Staff

### Notice of Republication

This article was republished on March 15, 2017, to correct errors in figures that were introduced during the typesetting process. The publisher apologizes for the errors. Please download this article again to view the correct version. The originally published, uncorrected article and the republished, corrected article are provided here for reference.

### Supporting information

**S1 File. Originally published, uncorrected article.**

(PDF)

**S2 File. Republished, corrected article.**

(PDF)

### Reference

1. Kather JN, Zöllner FG, Schad LR, Melchers SM, Sinn H-P, Marx A, et al. (2017) Identification of a characteristic vascular belt zone in human colorectal cancer. *PLoS ONE* 12(3): e0171378. doi:[10.1371/journal.pone.0171378](https://doi.org/10.1371/journal.pone.0171378) PMID: [28253263](https://pubmed.ncbi.nlm.nih.gov/28253263/)

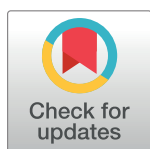

### OPEN ACCESS

**Citation:** The *PLOS ONE* Staff (2017) Correction: Identification of a characteristic vascular belt zone in human colorectal cancer. *PLoS ONE* 12(5): e0177586. <https://doi.org/10.1371/journal.pone.0177586>

**Published:** May 8, 2017

**Copyright:** © 2017 The PLOS ONE Staff. This is an open access article distributed under the terms of the [Creative Commons Attribution License](https://creativecommons.org/licenses/by/4.0/), which permits unrestricted use, distribution, and reproduction in any medium, provided the original author and source are credited.
